# Supplementary material for: Genome-wide analysis of H3.3 dissociation reveals high nucleosome turnover at distal regulatory regions of embryonic stem cells
Source: PubMed Central journal article supplement (PMC4297464; doi:10.1186/1756-8935-7-38), 2014-12-20

A

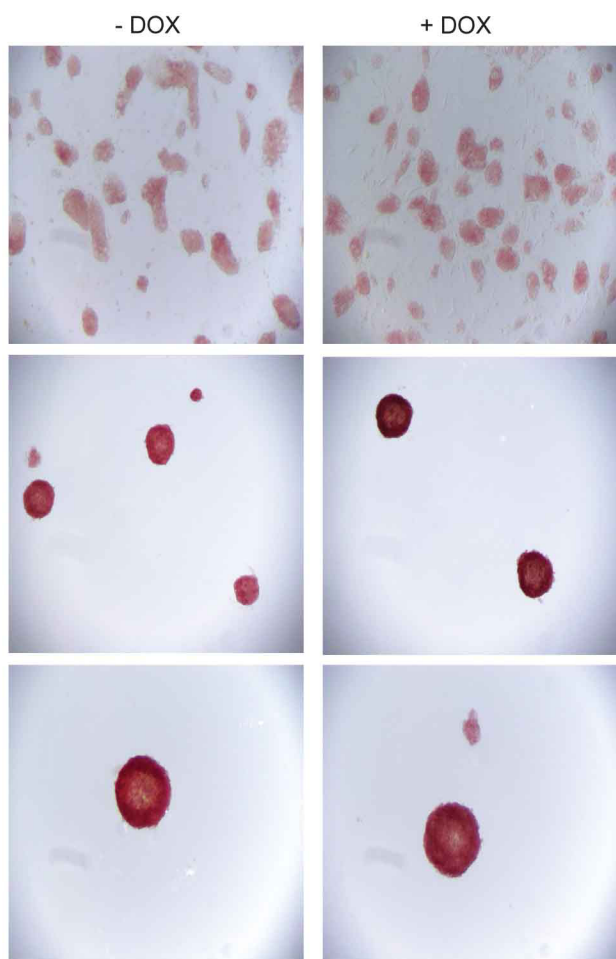

B

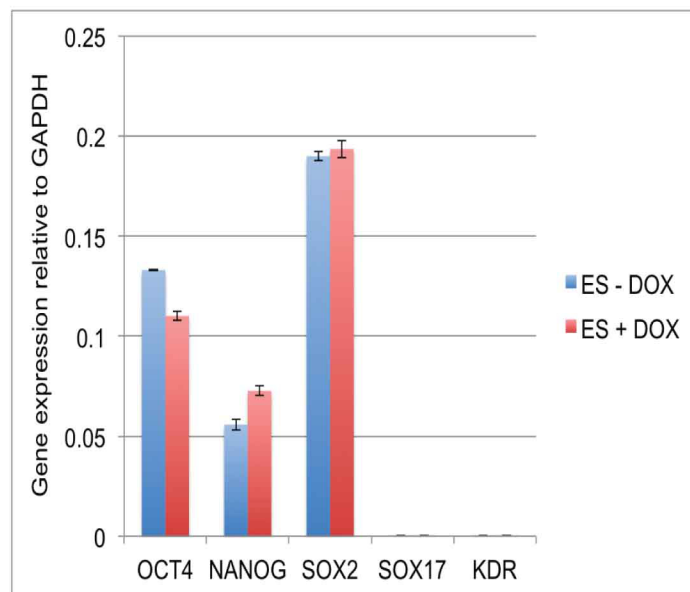

C

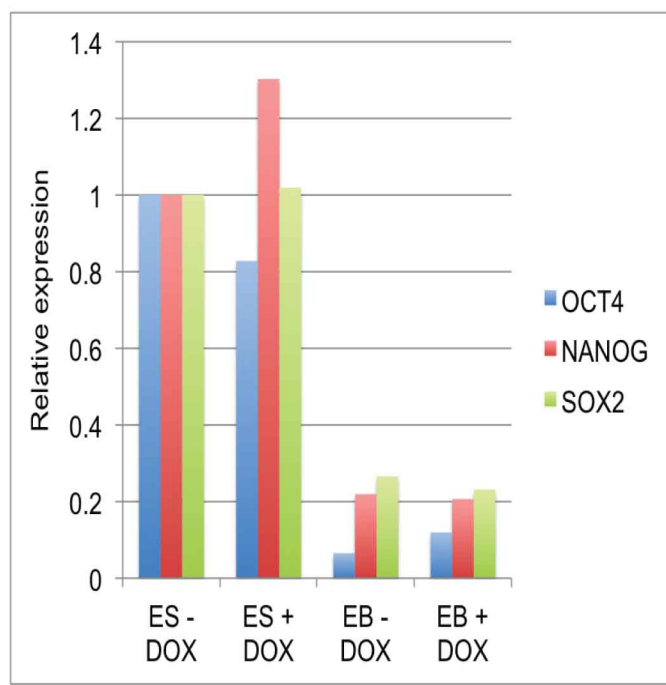

D

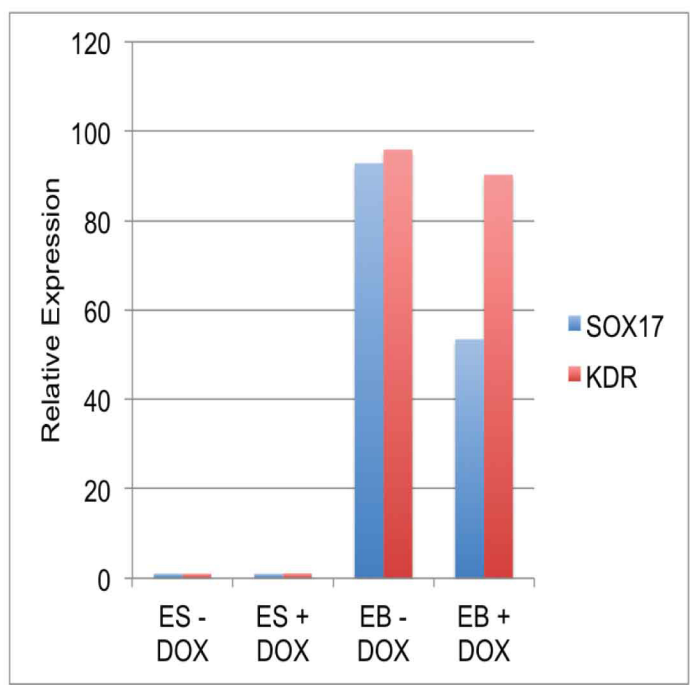

Supplement: 13072_2014_344_MOESM1_ESM.pdf [file 13072_2014_344_MOESM1_ESM.pdf]
